# Supplementary material for: Dynamic changes in quality of life after three first-line therapies for EGFR mutation-positive advanced non-small-cell lung cancer
Source: PubMed Central journal article supplement — Ther Adv Med Oncol. 2018 Feb 5;10:1758834018755072. doi: 10.1177/1758834018755072 (PMC5802707; doi:10.1177/1758834018755072), 2018-02-05
Supplement: Ther_Adv_Med_Oncol_revision_supplement_marked1.pdf [file Ther_Adv_Med_Oncol_revision_supplement_marked1.pdf]

# **Dynamic changes in quality of life after three first-line therapies for EGFR mutation-positive advanced non-small cell lung cancer**

Szu-Chun Yang, Chien-Chung Lin, Wu-Wei Lai, Sheng-Mao Chang, Jing-Shiang

Hwang, Wu-Chou Su and Jung-Der Wang

Correspondence to: Jung-Der Wang, E-mail: [jdwang121@gmail.com](mailto:jdwang121@gmail.com) and Wu-Chou

Su, E-mail: [sunnysu@mail.ncku.edu.tw](mailto:sunnysu@mail.ncku.edu.tw)

**Supplementary Figure 1.** Progression-free survival and overall survival stratified according to different first-line treatments.

**Supplementary Figure 2.** Fluctuations in utility values and QoL scores in 4 domains after first-line treatment with erlotinib versus gefitinib. The colored shadow illustrates a 95% confidence interval for each function. QoL: quality of life.

**Supplementary Figure 3.** Score changes in 9 facets after first-line treatment with erlotinib versus gefitinib. The colored shadow illustrates a 95% confidence interval for each function.

# Supplementary Figure 1

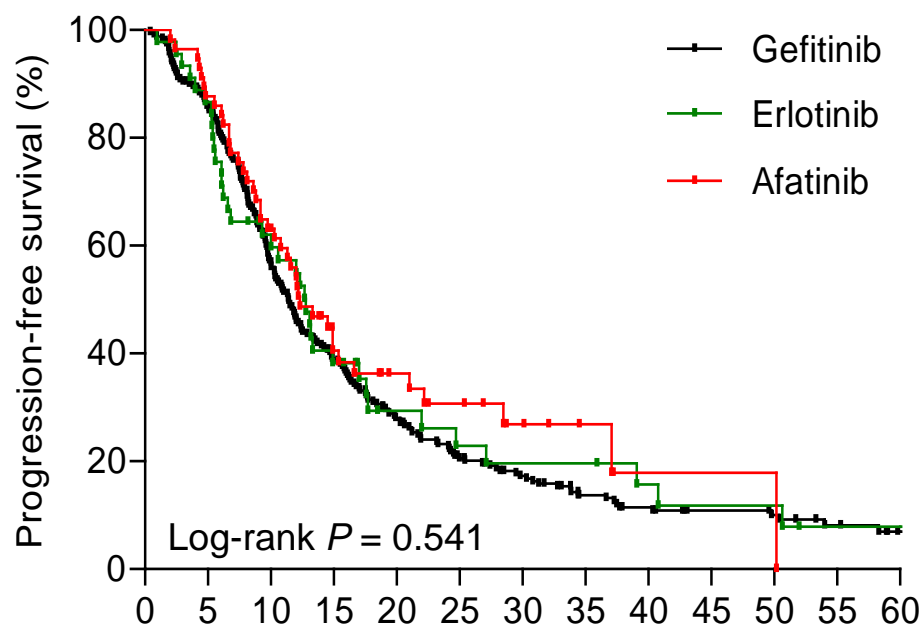

| No. of subjects at risk | Time after treatment (months) |     |     |    |    |    |    |    |    |    |    |    |    |
|-------------------------|-------------------------------|-----|-----|----|----|----|----|----|----|----|----|----|----|
|                         | 0                             | 5   | 10  | 15 | 20 | 25 | 30 | 35 | 40 | 45 | 50 | 55 | 60 |
| Gefitinib               | 242                           | 209 | 138 | 94 | 66 | 47 | 37 | 25 | 20 | 15 | 13 | 9  | 4  |
| Erlotinib               | 45                            | 40  | 27  | 17 | 10 | 8  | 7  | 7  | 5  | 4  | 4  | 2  | 2  |
| Afatinib                | 57                            | 51  | 37  | 21 | 14 | 11 | 7  | 4  | 2  | 2  | 2  | 0  | 0  |

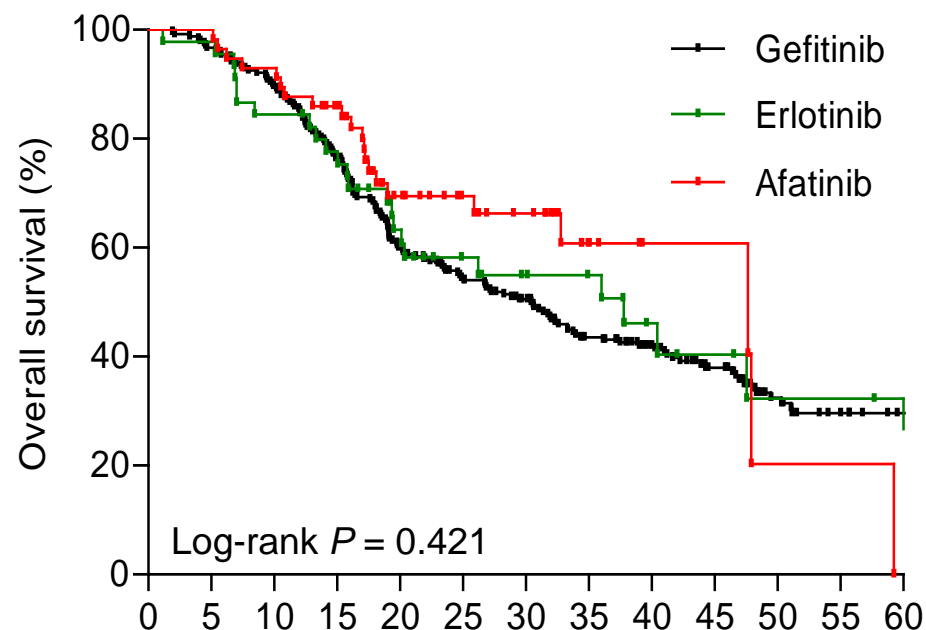

| No. of subjects at risk | Time after treatment (months) |     |     |     |     |     |     |    |    |    |    |    |    |
|-------------------------|-------------------------------|-----|-----|-----|-----|-----|-----|----|----|----|----|----|----|
|                         | 0                             | 5   | 10  | 15  | 20  | 25  | 30  | 35 | 40 | 45 | 50 | 55 | 60 |
| Gefitinib               | 242                           | 235 | 218 | 185 | 144 | 126 | 113 | 92 | 77 | 59 | 36 | 28 | 23 |
| Erlotinib               | 45                            | 45  | 39  | 35  | 26  | 19  | 16  | 14 | 9  | 7  | 5  | 5  | 4  |
| Afatinib                | 57                            | 57  | 54  | 46  | 30  | 23  | 19  | 9  | 4  | 4  | 2  | 2  | 0  |

## Supplementary Figure 2

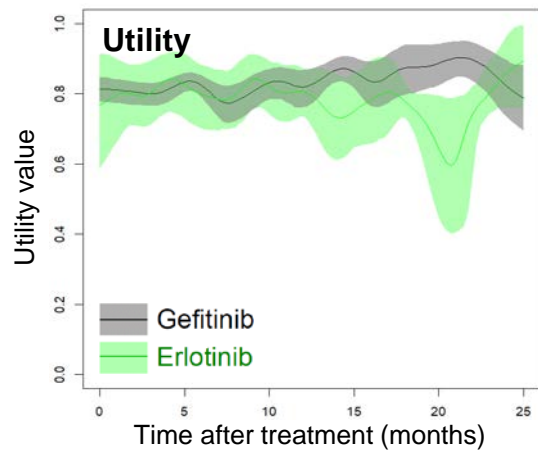

### Gefitinib

|                                            |     |     |     |     |     |     |
|--------------------------------------------|-----|-----|-----|-----|-----|-----|
| No. of subjects                            | 242 | 235 | 218 | 185 | 144 | 126 |
| No. of QoLs assessed after this time point | 662 | 424 | 277 | 185 | 130 | 91  |

### Erlotinib

|                                            |     |    |    |    |    |    |
|--------------------------------------------|-----|----|----|----|----|----|
| No. of subjects                            | 45  | 45 | 39 | 35 | 26 | 19 |
| No. of QoLs assessed after this time point | 119 | 82 | 56 | 35 | 19 | 13 |

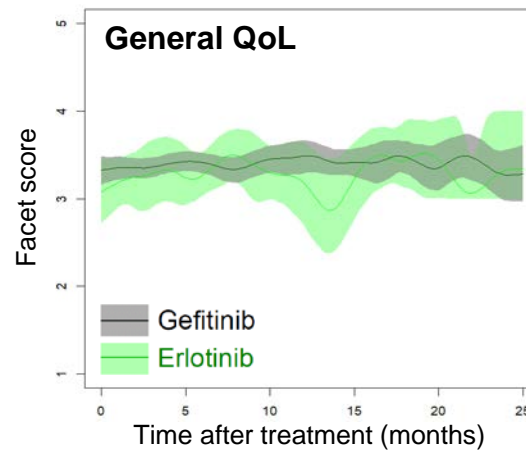

### Gefitinib

|                                            |     |     |     |     |     |     |
|--------------------------------------------|-----|-----|-----|-----|-----|-----|
| No. of subjects                            | 242 | 235 | 218 | 185 | 144 | 126 |
| No. of QoLs assessed after this time point | 661 | 422 | 275 | 183 | 129 | 90  |

### Erlotinib

|                                            |     |    |    |    |    |    |
|--------------------------------------------|-----|----|----|----|----|----|
| No. of subjects                            | 45  | 45 | 39 | 35 | 26 | 19 |
| No. of QoLs assessed after this time point | 118 | 80 | 55 | 35 | 19 | 13 |

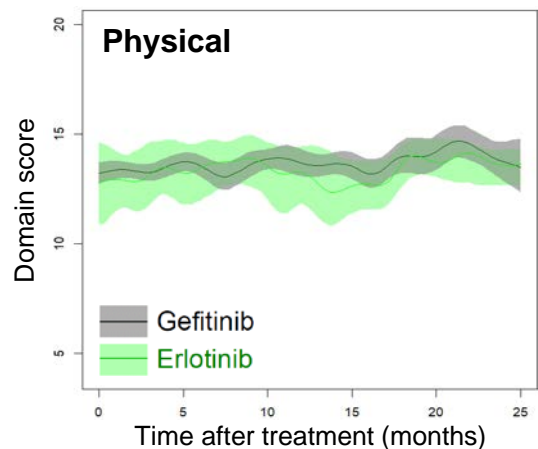

### Gefitinib

|                                            |     |     |     |     |     |     |
|--------------------------------------------|-----|-----|-----|-----|-----|-----|
| No. of subjects                            | 242 | 235 | 218 | 185 | 144 | 126 |
| No. of QoLs assessed after this time point | 660 | 422 | 275 | 183 | 129 | 90  |

### Erlotinib

|                                            |     |    |    |    |    |    |
|--------------------------------------------|-----|----|----|----|----|----|
| No. of subjects                            | 45  | 45 | 39 | 35 | 26 | 19 |
| No. of QoLs assessed after this time point | 118 | 80 | 55 | 35 | 19 | 13 |

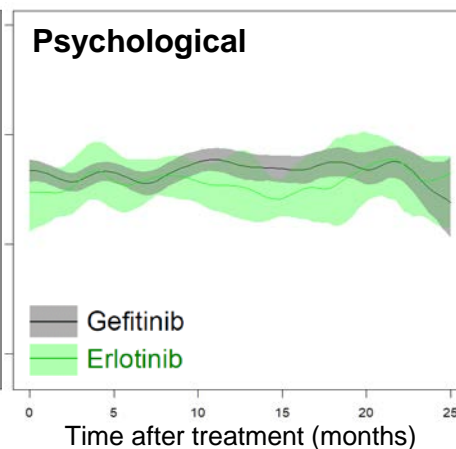

### Gefitinib

|                                            |     |     |     |     |     |     |
|--------------------------------------------|-----|-----|-----|-----|-----|-----|
| No. of subjects                            | 242 | 235 | 218 | 185 | 144 | 126 |
| No. of QoLs assessed after this time point | 661 | 422 | 275 | 183 | 129 | 90  |

### Erlotinib

|                                            |     |    |    |    |    |    |
|--------------------------------------------|-----|----|----|----|----|----|
| No. of subjects                            | 45  | 45 | 39 | 35 | 26 | 19 |
| No. of QoLs assessed after this time point | 118 | 80 | 55 | 35 | 19 | 13 |

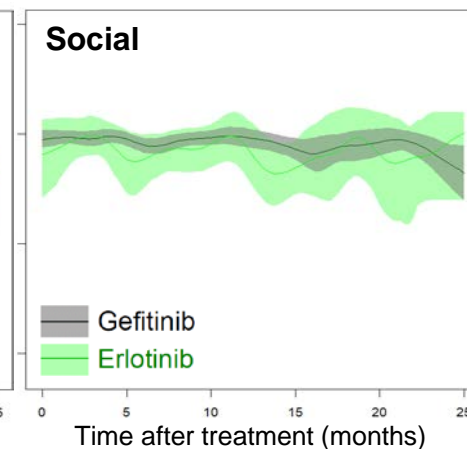

### Gefitinib

|                                            |     |     |     |     |     |     |
|--------------------------------------------|-----|-----|-----|-----|-----|-----|
| No. of subjects                            | 242 | 235 | 218 | 185 | 144 | 126 |
| No. of QoLs assessed after this time point | 661 | 422 | 275 | 183 | 129 | 90  |

### Erlotinib

|                                            |     |    |    |    |    |    |
|--------------------------------------------|-----|----|----|----|----|----|
| No. of subjects                            | 45  | 45 | 39 | 35 | 26 | 19 |
| No. of QoLs assessed after this time point | 118 | 80 | 55 | 35 | 19 | 13 |

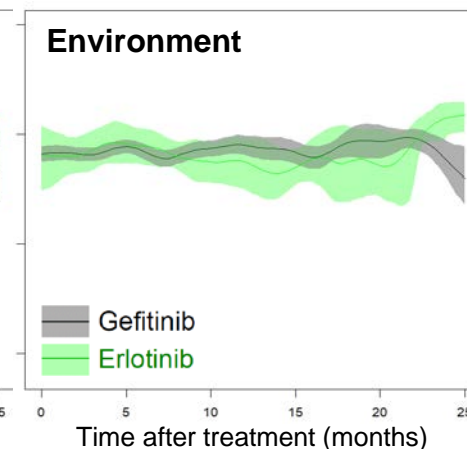

### Gefitinib

|                                            |     |     |     |     |     |     |
|--------------------------------------------|-----|-----|-----|-----|-----|-----|
| No. of subjects                            | 242 | 235 | 218 | 185 | 144 | 126 |
| No. of QoLs assessed after this time point | 661 | 422 | 275 | 183 | 129 | 90  |

### Erlotinib

|                                            |     |    |    |    |    |    |
|--------------------------------------------|-----|----|----|----|----|----|
| No. of subjects                            | 45  | 45 | 39 | 35 | 26 | 19 |
| No. of QoLs assessed after this time point | 118 | 80 | 55 | 35 | 19 | 13 |

Supplementary Figure 3

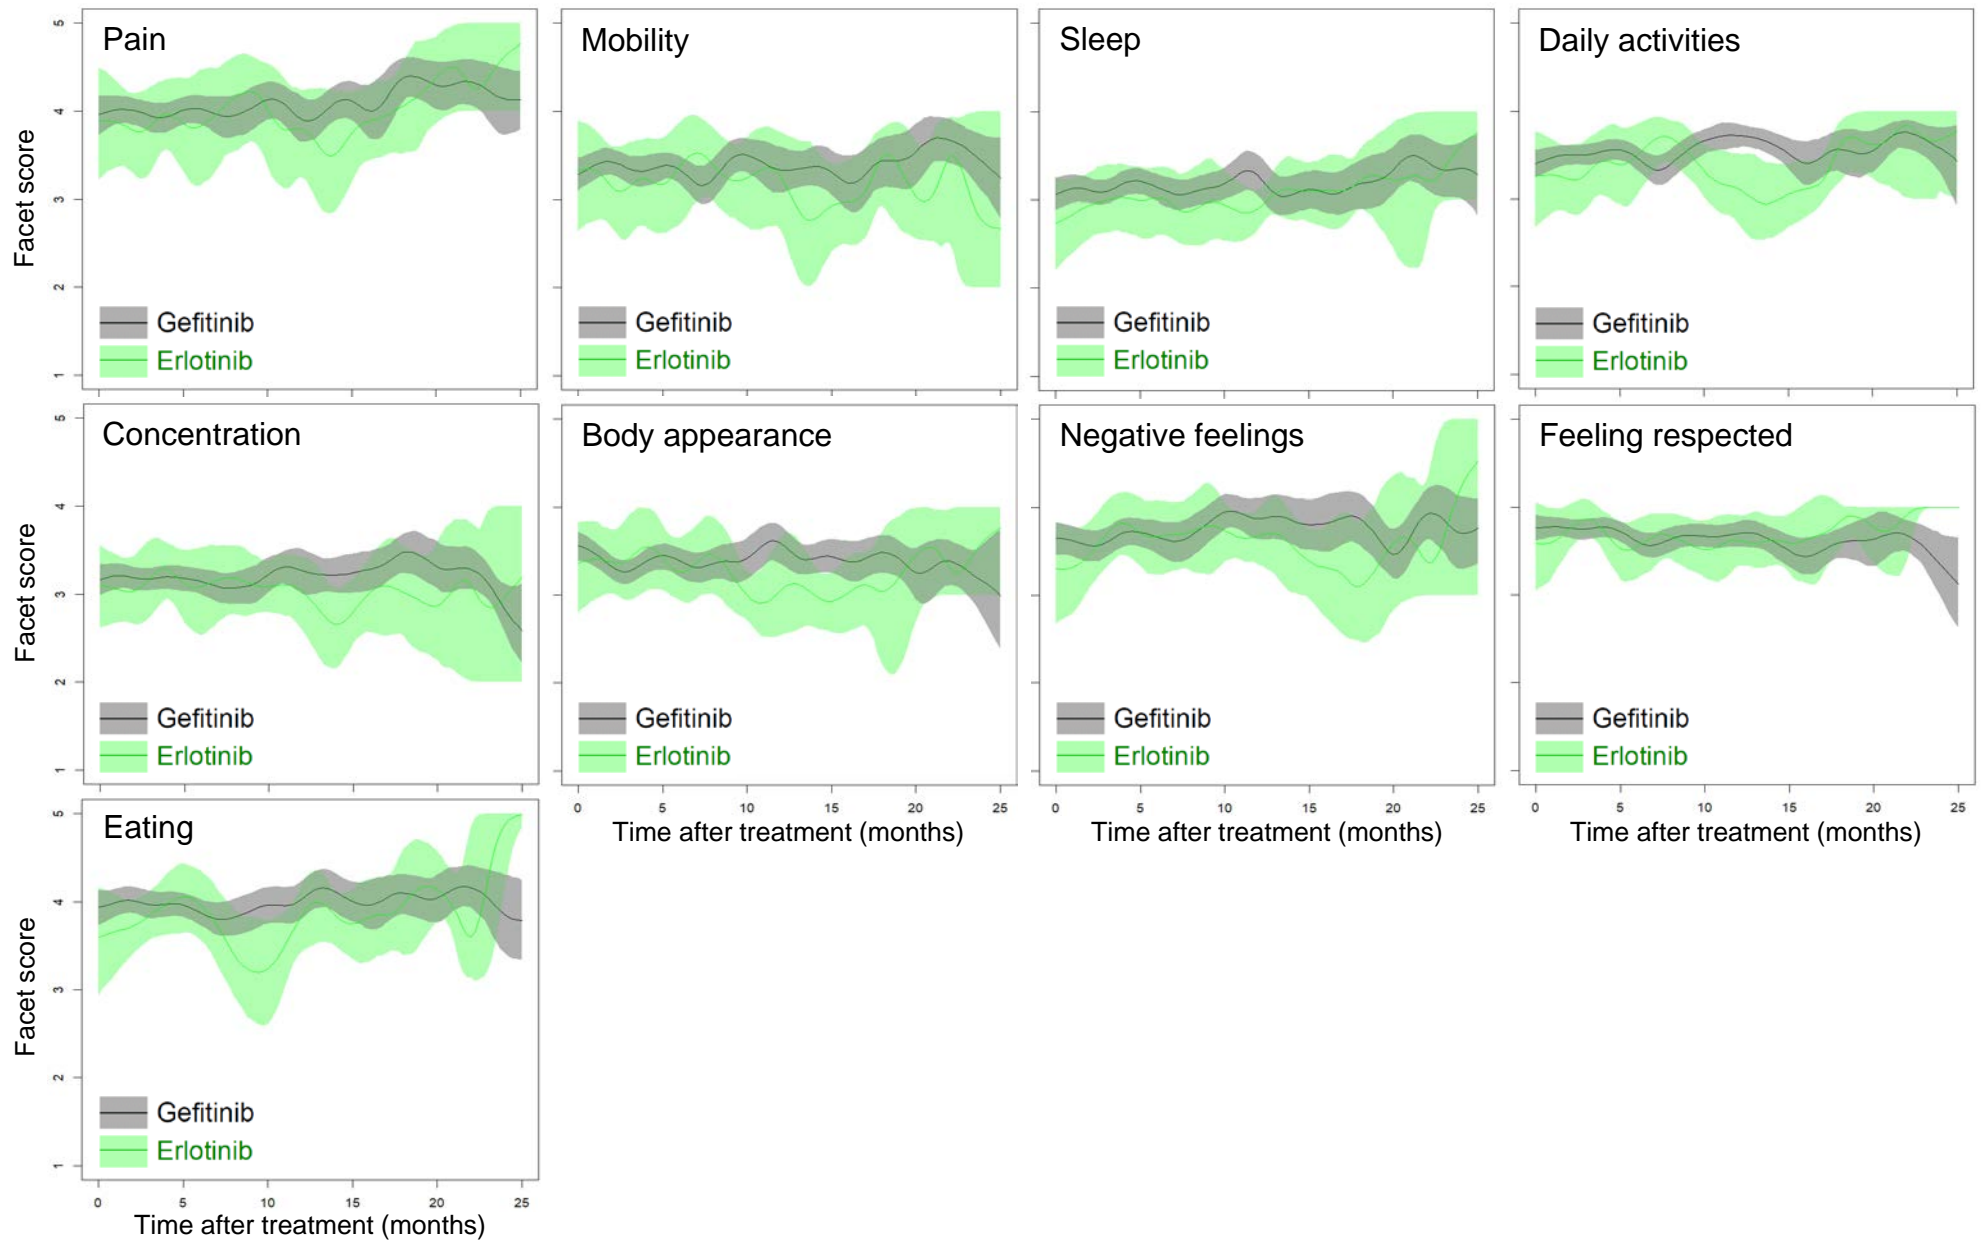

**Supplementary Table 1.** Frequency distribution of the number of QoL assessments per participant

| Number of QoL assessments | Participants, <i>n</i> (%) |
|---------------------------|----------------------------|
| 1                         | 119 (34.6)                 |
| 2                         | 84 (24.4)                  |
| 3                         | 69 (20.1)                  |
| 4                         | 21 (6.1)                   |
| 5                         | 15 (4.4)                   |
| 6                         | 12 (3.5)                   |
| 7                         | 7 (2.0)                    |
| 8                         | 7 (2.0)                    |
| 9                         | 2 (0.6)                    |
| 10                        | 3 (0.9)                    |
| 11                        | 4 (1.2)                    |
| 12                        | 1 (0.3)                    |

**Supplementary Table 2.** Demographic and clinical characteristics of participants with common EGFR mutations

|                                                | Gefitinib<br><i>n</i> = 225 | Erlotinib<br><i>n</i> = 44 | Afatinib<br><i>n</i> = 48 | <i>P</i>           |
|------------------------------------------------|-----------------------------|----------------------------|---------------------------|--------------------|
| Number of subjects                             |                             |                            |                           |                    |
| Number of assessments, <i>n</i>                | 631                         | 120                        | 116                       |                    |
| Age <sup>a</sup> , mean (SD) years             | 63.7 (11.1)                 | 62.0 (12.9)                | 60.1 (10.1)               | 0.117 <sup>b</sup> |
| Male, <i>n</i> (%)                             | 85 (37.8)                   | 19 (43.2)                  | 20 (41.7)                 | 0.739              |
| Education, <i>n</i> (%)                        |                             |                            |                           |                    |
| ≥ 12 years                                     | 41 (18.2)                   | 15 (34.1)                  | 16 (33.3)                 | 0.012              |
| < 12 years                                     | 183 (81.3)                  | 29 (65.9)                  | 32 (66.7)                 |                    |
| Missing                                        | 1 (0.4)                     | 0                          | 0                         |                    |
| Employment, <i>n</i> (%)                       |                             |                            |                           |                    |
| Employed                                       | 51 (22.7)                   | 12 (27.3)                  | 17 (35.4)                 | 0.146              |
| Unemployed                                     | 174 (77.3)                  | 32 (72.7)                  | 30 (62.5)                 |                    |
| Missing                                        | 0                           | 0                          | 1 (2.1)                   |                    |
| Marital status, <i>n</i> (%)                   |                             |                            |                           |                    |
| Married                                        | 167 (74.2)                  | 36 (81.8)                  | 39 (81.3)                 | 0.381              |
| Single/divorced/widowed                        | 58 (25.8)                   | 8 (18.2)                   | 9 (18.8)                  |                    |
| Comorbidities, <i>n</i> (%)                    |                             |                            |                           |                    |
| Cerebrovascular disease                        | 8 (3.6)                     | 4 (9.1)                    | 1 (2.1)                   | 0.178              |
| Coronary artery disease                        | 11 (4.9)                    | 2 (4.6)                    | 1 (2.1)                   | 0.691              |
| COPD                                           | 13 (5.8)                    | 4 (9.1)                    | 2 (4.2)                   | 0.591              |
| Diabetes mellitus                              | 26 (11.6)                   | 6 (13.6)                   | 3 (6.3)                   | 0.476              |
| End-stage renal disease                        | 8 (3.6)                     | 1 (2.3)                    | 1 (2.1)                   | 0.814              |
| Performance status <sup>a</sup> , <i>n</i> (%) |                             |                            |                           |                    |
| ECOG: 0-1                                      | 205 (91.1)                  | 38 (86.4)                  | 46 (95.8)                 | 0.267              |
| ECOG: 2-4                                      | 19 (8.4)                    | 6 (13.6)                   | 2 (4.2)                   |                    |
| Missing                                        | 1 (0.4)                     | 0                          | 0                         |                    |
| Disease by recurrence, <i>n</i> (%)            |                             |                            |                           |                    |
| Recurrent lung cancer                          | 42 (18.7)                   | 9 (20.5)                   | 9 (18.8)                  | 0.962              |
| Newly-diagnosed lung cancer                    | 183 (81.3)                  | 35 (79.6)                  | 39 (81.3)                 |                    |
| Mutation subtype, <i>n</i> (%)                 |                             |                            |                           |                    |
| Exon 19 deletions                              | 98 (43.6)                   | 18 (40.9)                  | 30 (62.5)                 | 0.044              |
| L858R substitution                             | 127 (56.4)                  | 26 (59.1)                  | 18 (37.5)                 |                    |
| Brain metastasis <sup>a</sup> , <i>n</i> (%)   | 51 (22.7)                   | 22 (50.0)                  | 15 (31.3)                 | 0.001              |
| PFS, median (IQR) months                       | 11.8 (7.7-21.9)             | 12.8 (6.1-24.7)            | 12.2 (7.1-28.5)           | 0.824              |

<sup>a</sup> At the initiation of treatment. <sup>b</sup> *P* = 0.041 using *t* test to compare afatinib with gefitinib.

COPD, chronic obstructive pulmonary disease; ECOG, Eastern Cooperative Oncology Group; EGFR, epidermal growth factor receptor; IQR, interquartile range; PFS, progression-free survival; SD, standard deviation.

**Supplementary Table 3.** Regression coefficients based on mixed model analyses in participants with common EGFR mutations

|                    | Sex<br>(male/female)    | Education<br>(≥12/<12)  | COPD<br>(no/yes)        | ECOG<br>(0-1/2-4)       | EGFR<br>(del19/L858R)   | Brain<br>metastasis<br>(yes/no) | Disease<br>progression<br>(yes/no) | Erlotinib<br>vs.<br>Gefitinib | Afatinib<br>vs.<br>Gefitinib |
|--------------------|-------------------------|-------------------------|-------------------------|-------------------------|-------------------------|---------------------------------|------------------------------------|-------------------------------|------------------------------|
| EQ-5D:             |                         |                         |                         |                         |                         |                                 |                                    |                               |                              |
| Utility value      |                         |                         |                         | 0.26(0.03) <sup>c</sup> |                         | -0.04(0.02) <sup>a</sup>        | -0.08(0.02) <sup>c</sup>           |                               |                              |
| WHOQOL-BREF:       |                         |                         |                         |                         |                         |                                 |                                    |                               |                              |
| General QoL        |                         | 0.26(0.08) <sup>c</sup> |                         | 0.43(0.11) <sup>c</sup> | 0.14(0.06) <sup>a</sup> |                                 | -0.35(0.08) <sup>c</sup>           |                               | -0.25(0.09) <sup>b</sup>     |
| Physical           |                         | 0.65(0.29) <sup>a</sup> |                         | 2.47(0.36) <sup>c</sup> | 0.54(0.23) <sup>a</sup> | -0.54(0.26) <sup>a</sup>        | -0.73(0.26) <sup>b</sup>           |                               | -0.73(0.32) <sup>a</sup>     |
| Pain               |                         |                         |                         | 0.78(0.15) <sup>c</sup> |                         |                                 | -0.33(0.12) <sup>b</sup>           |                               | -0.31(0.12) <sup>a</sup>     |
| Energy/fatigue     |                         |                         | 0.36(0.14) <sup>a</sup> | 0.43(0.13) <sup>b</sup> | 0.19(0.08) <sup>a</sup> | -0.24(0.09) <sup>b</sup>        | -0.34(0.10) <sup>c</sup>           |                               |                              |
| Mobility           |                         |                         |                         | 1.27(0.13) <sup>c</sup> | 0.18(0.08) <sup>a</sup> | -0.20(0.09) <sup>a</sup>        | -0.27(0.10) <sup>b</sup>           |                               |                              |
| Sleep              | 0.21(0.10) <sup>a</sup> |                         | 0.45(0.16) <sup>b</sup> |                         |                         |                                 |                                    |                               | -0.26(0.12) <sup>a</sup>     |
| Daily activities   |                         |                         |                         | 0.91(0.11) <sup>c</sup> | 0.21(0.07) <sup>b</sup> | -0.15(0.08) <sup>a</sup>        | -0.21(-0.08) <sup>b</sup>          |                               | -0.24(0.09) <sup>a</sup>     |
| Psychological      | 0.63(0.27) <sup>a</sup> | 0.63(0.31) <sup>a</sup> |                         | 1.83(0.38) <sup>c</sup> | 1.02(0.25) <sup>c</sup> |                                 | -0.74(0.26) <sup>b</sup>           |                               | -1.04(0.35) <sup>b</sup>     |
| Concentration      |                         | 0.32(0.10) <sup>b</sup> |                         | 0.54(0.13) <sup>c</sup> | 0.26(0.08) <sup>c</sup> | -0.22(0.09) <sup>a</sup>        | -0.29(0.09) <sup>b</sup>           |                               | -0.28(0.11) <sup>b</sup>     |
| Body appearance    | 0.27(0.09) <sup>b</sup> |                         |                         | 0.33(0.14) <sup>a</sup> | 0.21(0.08) <sup>a</sup> |                                 | -0.23(0.10) <sup>a</sup>           |                               | -0.38(0.11) <sup>b</sup>     |
| Negative feelings  | 0.37(0.10) <sup>c</sup> |                         |                         | 0.43(0.15) <sup>b</sup> | 0.35(0.09) <sup>c</sup> |                                 |                                    |                               | -0.35(0.13) <sup>b</sup>     |
| Social             |                         |                         |                         | 0.97(0.32) <sup>b</sup> | 0.48(0.21) <sup>a</sup> |                                 | -0.42(0.21) <sup>a</sup>           |                               | -1.16(0.29) <sup>c</sup>     |
| Feeling respected  |                         |                         |                         |                         | 0.16(0.07) <sup>a</sup> |                                 | -0.17(0.08) <sup>a</sup>           |                               | -0.24(0.09) <sup>b</sup>     |
| Environment        |                         | 0.75(0.23) <sup>b</sup> |                         | 1.13(0.28) <sup>c</sup> | 0.40(0.19) <sup>a</sup> |                                 | -0.50(0.19) <sup>b</sup>           |                               |                              |
| Financial support  |                         | 0.59(0.12) <sup>c</sup> |                         |                         |                         |                                 |                                    |                               |                              |
| Leisure activities |                         | 0.32(0.12) <sup>b</sup> |                         | 0.78(0.16) <sup>c</sup> |                         |                                 | -0.30(0.11) <sup>b</sup>           |                               |                              |
| Eating             |                         |                         |                         | 0.29(0.14) <sup>a</sup> |                         |                                 |                                    |                               | -0.25(0.12) <sup>a</sup>     |

Mixed model analyses adjusted for age, sex, education, employment, marital status, comorbidities, performance status, recurrence, EGFR mutation subtype, brain metastasis, disease progression and treatment. Values in parentheses are standard errors. <sup>a</sup>  $p < 0.05$ ; <sup>b</sup>  $p < 0.01$ ; <sup>c</sup>  $p < 0.001$ ; those with  $p \geq 0.05$  are left blank.

COPD, chronic obstructive pulmonary disease; del19, exon 19 deletions; ECOG, Eastern Cooperative Oncology Group; EGFR, epidermal growth factor receptor; EQ-5D, EuroQol five-dimension questionnaire; QoL, quality of life; WHOQOL-BREF, World Health Organization Quality-of-Life—Brief version.

**Supplementary Table 4.** Demographic and clinical characteristics of participants with newly-diagnosed lung cancer

|                                                | Gefitinib<br><i>n</i> = 196 | Erlotinib<br><i>n</i> = 36 | Afatinib<br><i>n</i> = 45 | <i>P</i>           |
|------------------------------------------------|-----------------------------|----------------------------|---------------------------|--------------------|
| Number of subjects                             |                             |                            |                           |                    |
| Number of assessments, <i>n</i>                | 497                         | 71                         | 102                       |                    |
| Age <sup>a</sup> , mean (SD) years             | 63.8 (11.6)                 | 62.4 (12.2)                | 59.6 (10.0)               | 0.078 <sup>b</sup> |
| Male, <i>n</i> (%)                             | 71 (36.2)                   | 18 (50.0)                  | 18 (40.0)                 | 0.290              |
| Education, <i>n</i> (%)                        |                             |                            |                           |                    |
| ≥ 12 years                                     | 33 (16.8)                   | 12 (33.3)                  | 15 (33.3)                 | 0.011              |
| < 12 years                                     | 162 (82.7)                  | 24 (66.7)                  | 30 (66.7)                 |                    |
| Missing                                        | 1 (0.5)                     | 0                          | 0                         |                    |
| Employment, <i>n</i> (%)                       |                             |                            |                           |                    |
| Employed                                       | 39 (19.9)                   | 10 (27.8)                  | 14 (31.1)                 | 0.153              |
| Unemployed                                     | 157 (80.1)                  | 26 (72.2)                  | 29 (64.4)                 |                    |
| Missing                                        | 0                           | 0                          | 2 (4.4)                   |                    |
| Marital status, <i>n</i> (%)                   |                             |                            |                           |                    |
| Married                                        | 143 (73.0)                  | 33 (91.7)                  | 34 (75.6)                 | 0.055              |
| Single/divorced/widowed                        | 53 (27.0)                   | 3 (8.3)                    | 11 (24.4)                 |                    |
| Comorbidities, <i>n</i> (%)                    |                             |                            |                           |                    |
| Cerebrovascular disease                        | 7 (3.6)                     | 2 (5.6)                    | 0                         | 0.335              |
| Coronary artery disease                        | 10 (5.1)                    | 1 (2.8)                    | 1 (2.2)                   | 0.615              |
| COPD                                           | 11 (5.6)                    | 3 (8.3)                    | 2 (4.4)                   | 0.745              |
| Diabetes mellitus                              | 23 (11.7)                   | 6 (16.7)                   | 1 (2.2)                   | 0.087              |
| End-stage renal disease                        | 9 (4.6)                     | 1 (2.8)                    | 0                         | 0.317              |
| Performance status <sup>a</sup> , <i>n</i> (%) |                             |                            |                           |                    |
| ECOG: 0-1                                      | 176 (89.8)                  | 32 (88.9)                  | 40 (88.9)                 | 0.943              |
| ECOG: 2-4                                      | 19 (9.7)                    | 4 (11.1)                   | 5 (11.1)                  |                    |
| Missing                                        | 1 (0.5)                     | 0                          | 0                         |                    |
| Mutation subtype, <i>n</i> (%)                 |                             |                            |                           |                    |
| Exon 19 deletions                              | 81 (41.3)                   | 13 (36.1)                  | 23 (51.1)                 | 0.112              |
| L858R substitution                             | 102 (52.0)                  | 22 (61.1)                  | 16 (35.6)                 |                    |
| Other mutations                                | 13 (6.6)                    | 1 (2.8)                    | 6 (13.3)                  |                    |
| Brain metastasis <sup>a</sup> , <i>n</i> (%)   | 52 (26.5)                   | 17 (47.2)                  | 17 (37.8)                 | 0.027              |
| PFS, median (IQR) months                       | 10.8 (6.9-19.4)             | 12.0 (5.4-17.6)            | 11.6 (7.4-16.6)           | 0.862              |

<sup>a</sup> At the initiation of treatment. <sup>b</sup> *P* = 0.024 using *t* test to compare afatinib with gefitinib.

COPD, chronic obstructive pulmonary disease; ECOG, Eastern Cooperative Oncology Group; IQR, interquartile range; PFS, progression-free survival; SD, standard deviation.



**Supplementary Table 5.** Regression coefficients based on mixed model analyses in participants with newly-diagnosed lung cancer

|                    | Sex<br>(male/female)     | Education<br>(≥12/<12)  | COPD<br>(no/yes)        | ECOG<br>(0-1/2-4)       | EGFR<br>(del19+/del19-) | Brain<br>metastasis<br>(yes/no) | Disease<br>progression<br>(yes/no) | Erlotinib<br>vs.<br>Gefitinib | Afatinib<br>vs.<br>Gefitinib |
|--------------------|--------------------------|-------------------------|-------------------------|-------------------------|-------------------------|---------------------------------|------------------------------------|-------------------------------|------------------------------|
| EQ-5D:             |                          |                         |                         |                         |                         |                                 |                                    |                               |                              |
| Utility value      |                          |                         |                         | 0.28(0.03) <sup>c</sup> |                         |                                 | -0.07(0.02) <sup>c</sup>           |                               |                              |
| WHOQOL-BREF:       |                          |                         |                         |                         |                         |                                 |                                    |                               |                              |
| General QoL        |                          | 0.31(0.09) <sup>c</sup> |                         | 0.46(0.11) <sup>c</sup> | 0.16(0.07) <sup>a</sup> |                                 | -0.34(0.09) <sup>c</sup>           |                               | -0.34(0.09) <sup>c</sup>     |
| Physical           |                          | 0.74(0.33) <sup>a</sup> |                         | 2.67(0.39) <sup>c</sup> |                         |                                 | -0.66(0.30) <sup>a</sup>           |                               |                              |
| Pain               |                          |                         |                         | 0.81(0.16) <sup>c</sup> |                         |                                 |                                    |                               |                              |
| Energy/fatigue     |                          | 0.24(0.12) <sup>a</sup> | 0.45(0.17) <sup>b</sup> | 0.45(0.14) <sup>b</sup> |                         | -0.21(0.10) <sup>a</sup>        | -0.25(0.11) <sup>a</sup>           |                               |                              |
| Mobility           |                          |                         |                         | 1.33(0.14) <sup>c</sup> |                         |                                 |                                    |                               |                              |
| Sleep              |                          | 0.29(0.13) <sup>a</sup> | 0.42(0.17) <sup>a</sup> |                         |                         |                                 |                                    |                               |                              |
| Daily activities   |                          |                         |                         | 0.95(0.12) <sup>c</sup> | 0.19(0.08) <sup>a</sup> |                                 | -0.24(0.09) <sup>b</sup>           |                               |                              |
| Psychological      |                          | 0.94(0.36) <sup>b</sup> |                         | 2.03(0.41) <sup>c</sup> | 1.00(0.27) <sup>c</sup> |                                 | -0.79(0.29) <sup>b</sup>           |                               | -0.90(0.37) <sup>a</sup>     |
| Concentration      |                          | 0.32(0.11) <sup>b</sup> |                         | 0.61(0.14) <sup>c</sup> | 0.24(0.09) <sup>b</sup> |                                 | -0.27(0.11) <sup>a</sup>           |                               |                              |
| Body appearance    | 0.24(0.10) <sup>a</sup>  |                         |                         | 0.32(0.14) <sup>a</sup> |                         |                                 | -0.23(0.11) <sup>a</sup>           |                               | -0.33(0.12) <sup>b</sup>     |
| Negative feelings  | 0.28(0.11) <sup>b</sup>  |                         |                         | 0.46(0.16) <sup>b</sup> | 0.36(0.10) <sup>c</sup> |                                 |                                    |                               |                              |
| Social             | -0.58(0.24) <sup>a</sup> |                         | 0.84(0.41) <sup>a</sup> | 1.14(0.34) <sup>c</sup> |                         |                                 | -0.56(0.24) <sup>a</sup>           |                               | -1.13(0.31) <sup>c</sup>     |
| Feeling respected  | -0.17(0.08) <sup>a</sup> |                         |                         |                         | 0.17(0.07) <sup>a</sup> |                                 | -0.22(0.09) <sup>a</sup>           |                               | -0.27(0.10) <sup>b</sup>     |
| Environment        |                          | 0.90(0.27) <sup>c</sup> |                         | 1.30(0.30) <sup>c</sup> |                         |                                 | -0.54(0.22) <sup>a</sup>           |                               |                              |
| Financial support  |                          | 0.64(0.14) <sup>c</sup> |                         |                         |                         |                                 |                                    |                               |                              |
| Leisure activities | -0.25(0.11) <sup>a</sup> | 0.39(0.14) <sup>b</sup> |                         | 0.89(0.16) <sup>c</sup> |                         |                                 |                                    |                               |                              |
| Eating             |                          |                         |                         | 0.45(0.15) <sup>b</sup> |                         |                                 |                                    |                               | -0.33(0.13) <sup>b</sup>     |

Mixed model analyses adjusted for age, sex, education, employment, marital status, comorbidities, performance status, EGFR mutation subtype, brain metastasis, disease progression and treatment. Values in parentheses are standard errors. <sup>a</sup>  $p < 0.05$ ; <sup>b</sup>  $p < 0.01$ ; <sup>c</sup>  $p < 0.001$ ; those with  $p \geq 0.05$  are left blank.

COPD, chronic obstructive pulmonary disease; del19, exon 19 deletions; ECOG, Eastern Cooperative Oncology Group; EGFR, epidermal growth factor receptor; EQ-5D, EuroQol five-dimension questionnaire; QoL, quality of life; WHOQOL-BREF, World Health Organization Quality-of-Life—Brief version.
